# Supplementary material for: Mn-doped 2D Sn-based perovskites with energy transfer from self-trapped excitons to dopants for warm white light-emitting diodes
Source: Royal Society of Chemistry journal article supplement (doi:10.1039/d0tc00959h), 2020-01-01
Supplement: d0tc00959h1.pdf [file d0tc00959h1.pdf]

## Electronic Supplementary Information

### **Mn-doped 2D Sn-based perovskites with energy transfer from self-trapped excitons to dopants for warm white light-emitting diodes**

*Lu Hou,<sup>a</sup> Yihua Zhu,<sup>\*a</sup> Jingrun Zhu,<sup>a</sup> Yiqin Gong,<sup>a</sup> and Chunzhong Li<sup>\*a, b</sup>*

*<sup>a</sup> Shanghai Engineering Research Center of Hierarchical Nanomaterials, Key Laboratory for Ultrafine Materials of Ministry of Education, School of Materials Science and Engineering, East China University of Science and Technology, Shanghai 200237, China.*

*Email: yhzhu@ecust.edu.cn*

*<sup>b</sup> School of Chemical Engineering, East China University of Science and Technology, Shanghai 200237, China.*

*Email: czli@ecust.edu.cn*

## **Experimental Section:**

**Characterization.** XRD patterns were carried out on a rotating anode X-ray powder diffractometer (Cu K $\alpha$ ). Electro-Spin Resonance Spectrometer (EPR) spectra were obtained by an electron paramagnetic resonance EPR spectrometer (Bruker). TEM images were obtained on JEM-2100 transmission electron microscope. Scanning electron microscopy (SEM) images were performed on S-4800 field emission scanning electron microscope equipped with energy-dispersive X-ray (EDX) detector. ICP elemental analysis was carried out through an Agilent 720/730 ICP-OES. Absorbance spectra were taken on a Shimadzu UV-2600 spectrophotometer; emission and excitation spectra were measured using FLS 1000 photoluminescence spectrometer. Time-resolved PL lifetime and photoluminescence quantum yield measurement were carried out using FLS 1000 photoluminescence spectrometer.

## **Computational Methods.**

Density function theory calculation were carried out by using DMol3 code. The band structure and the density of state of the crystal structure was calculated based on a generalized gradient approximation (GGA) functional and a revised Perdew-Burke-Ernzerhof (RPBE) functional. Brillouin zone was sampled with  $9\times 9\times 1$  Monkhorst-Pack grid. The lattice parameters were fixed at the experimentally measured values while the atomic positions were optimized.

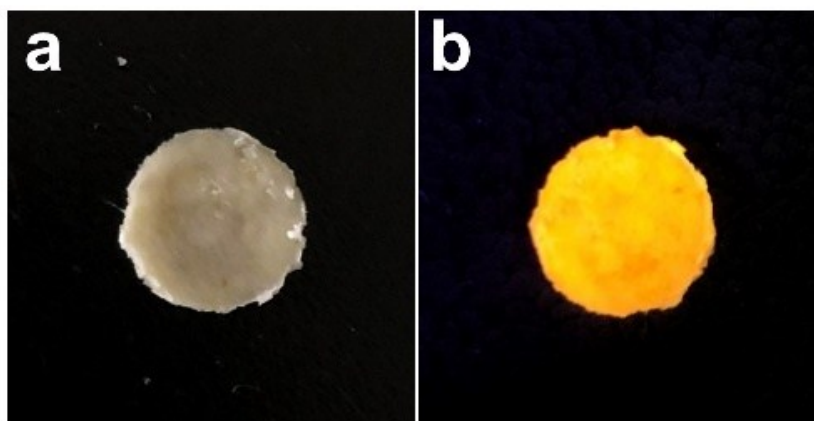

**Figure S1.** (a) Photographs of  $(\text{C}_8\text{H}_{17}\text{NH}_2)_2\text{Sn}_{1-x}\text{Mn}_x\text{Br}_4$  ( $x=0.26$ ) under room light. (b) Photographs of  $(\text{C}_8\text{H}_{17}\text{NH}_2)_2\text{Sn}_{1-x}\text{Mn}_x\text{Br}_4$  ( $x=0.26$ ) under UV light.

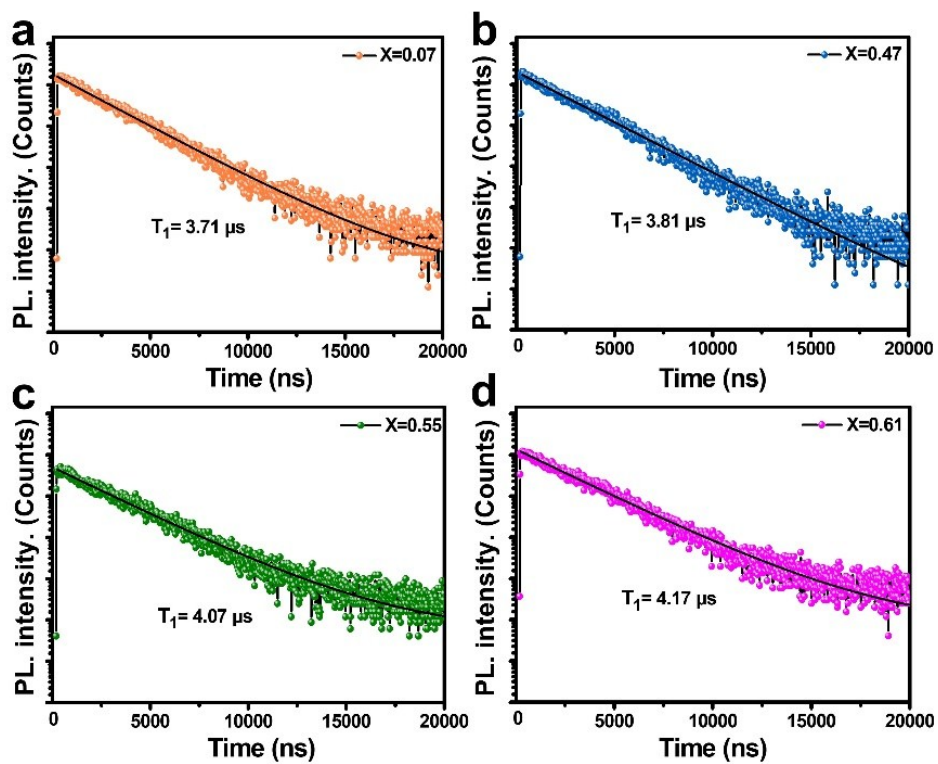

**Figure S2.** Time-resolved PL decay and fitting curves of the emission for  $(C_8H_{17}NH_2)_2Sn_{1-x}Mn_xBr_4$  (a)  $x=0.07$  (b)  $x=0.47$  (c)  $x=0.55$  and (d)  $x=0.61$ , respectively.

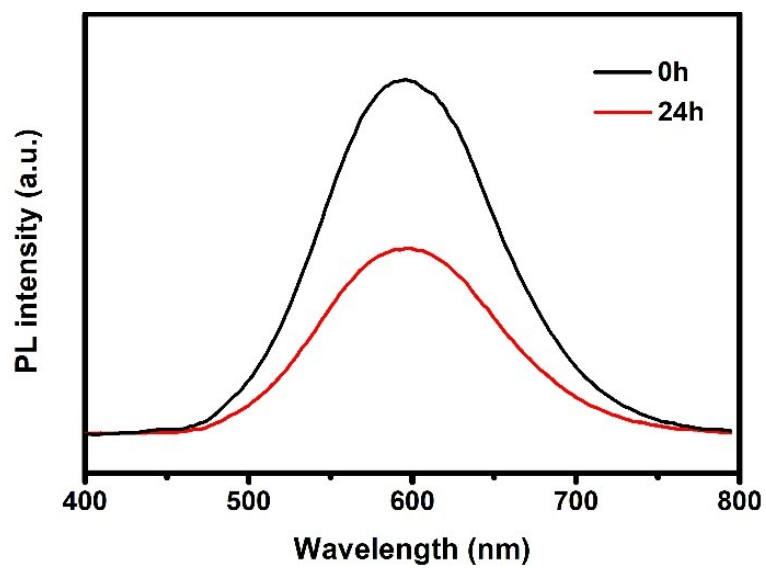

**Figure S3.** Photoluminescence spectra of  $(\text{C}_8\text{H}_{17}\text{NH}_2)_2\text{Sn}_{1-x}\text{Mn}_x\text{Br}_4$  ( $x=0.26$ ) powders after being stored in air for 24 hours.

**Table S1.** Summary progress of the PLQY of Mn-doped 2D perovskites synthesized by solid-state grinding.

| Mn-doped 2D perovskites                                                                   | Synthesis highlight  | PLQY | Ref.      |
|-------------------------------------------------------------------------------------------|----------------------|------|-----------|
| Mn-doped (C <sub>6</sub> H <sub>18</sub> N <sub>2</sub> O <sub>2</sub> )PbBr <sub>4</sub> | Solid-state grinding | 12%  | [18]      |
| Mn-doped (C <sub>4</sub> H <sub>9</sub> NH <sub>3</sub> ) <sub>2</sub> PbCl <sub>4</sub>  | Solid-state grinding | 27%  | [21]      |
| Mn-doped (C <sub>4</sub> H <sub>9</sub> NH <sub>3</sub> ) <sub>2</sub> PbBr <sub>4</sub>  | Solid-state grinding | 37%  | [30]      |
| Mn-doped (C <sub>8</sub> H <sub>17</sub> NH <sub>2</sub> ) <sub>2</sub> SnBr <sub>4</sub> | Solid-state grinding | 42%  | This work |

**Table S2.** PL emission peak wavelengths FWHM, solid PLQYs excited by 365 nm, and PL decay lifetimes excited by 340 nm of  $(C_8H_{17}NH_2)_2Sn_{1-x}Mn_xBr_4$  ( $x=0.07, 0.26, 0.47$  and  $0.61$ ).

| $(C_8H_{17}NH_2)_2Sn_{1-x}Mn_xBr_4$ | PL (nm)    | FWHM (nm)  | PLQY (%)     | Lifetime (ns)  |
|-------------------------------------|------------|------------|--------------|----------------|
| <b>X=0.07</b>                       | <b>587</b> | <b>110</b> | <b>63.95</b> | <b>3708.72</b> |
| <b>X=0.26</b>                       | <b>593</b> | <b>116</b> | <b>41.93</b> | <b>4090.67</b> |
| <b>X=0.47</b>                       | <b>600</b> | <b>121</b> | <b>38.76</b> | <b>3809.81</b> |
| <b>X=0.61</b>                       | <b>603</b> | <b>124</b> | <b>1.89</b>  | <b>4166.33</b> |
